# Supplementary material for: Plasmonic Metamaterial Ag Nanostructures on a Mirror for Colorimetric Sensing
Source: MDPI journal article supplement (doi:10.3390/nano13101650), 2023-05-16
Supplement: s1 [file s1]

## Supplementary Materials

# Plasmonic Metamaterial Ag Nanostructures on a Mirror for Colorimetric Sensing

Sayako Maeda, Noboru Osaka, Rei Niguma, Tetsuya Matsuyama, Kenji Wada, and Koichi Okamoto\*

\*Correspondence: OkamotoT@omu.ac.jp; Tel.: +81-72-254-9263

Department of Physics and Electronics, Osaka Metropolitan University,

Osaka 599-8531, Japan

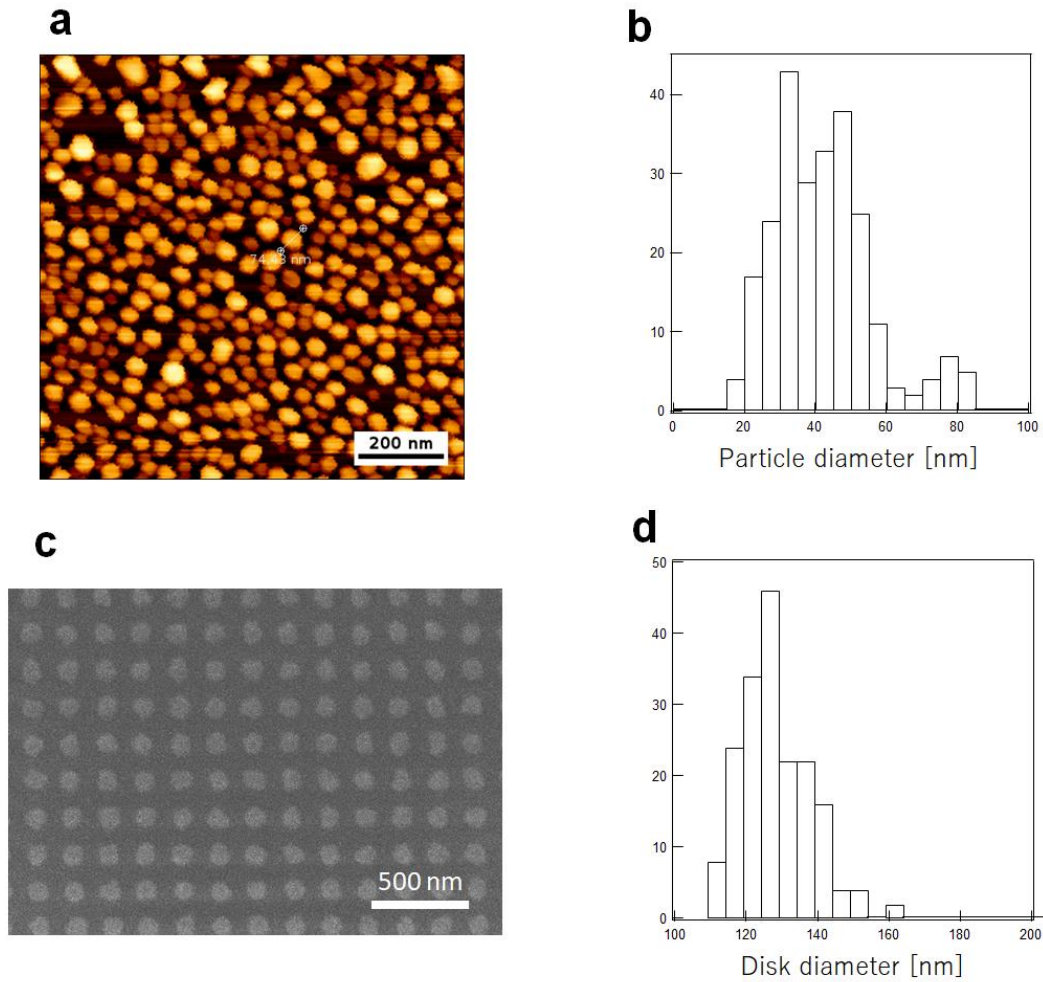

**Figure S1.** (a) AFM images and (b) histograms of diameters of the nano-hemispheres in NHoM structures shown in Figure 5d. (c) SEM images and (d) histograms of diameters of the nano-disks in NDoG structures shown in Figure 5e.
